# Supplementary material for: Influence of the acidity of solid catalyst HSO3-ZSM-5 on the hydrolysis of pretreated corncob
Source: Royal Society of Chemistry journal article supplement (doi:10.1039/c8ra09190k), 2018-01-01
Supplement: c8ra09190k1.pdf [file c8ra09190k1.pdf]

## Supporting Informations

### **Influence of the acidity of solid catalyst HSO<sub>3</sub>-ZSM-5 on hydrolysis of pretreated corncob**

*Nguyen Hoang Chung<sup>a</sup>, Le Quang Dien<sup>a</sup>, Thai Dinh Cuong<sup>a</sup>, Nguyen Van Lieu<sup>b</sup>  
and Phan Huy Hoang<sup>a\*</sup>*

*<sup>a</sup>School of Chemical Engineering, Hanoi University of Science & Technology, No.1, Dai Co Viet Street, Hanoi, Vietnam.*

*<sup>b</sup>Vietnam Institute for Building Materials, 235, Nguyen Trai Street, Hanoi, Vietnam*

*Corresponding author: [hoang.phanhuy@hust.edu.vn](mailto:hoang.phanhuy@hust.edu.vn) phone: +84-4-38684955*

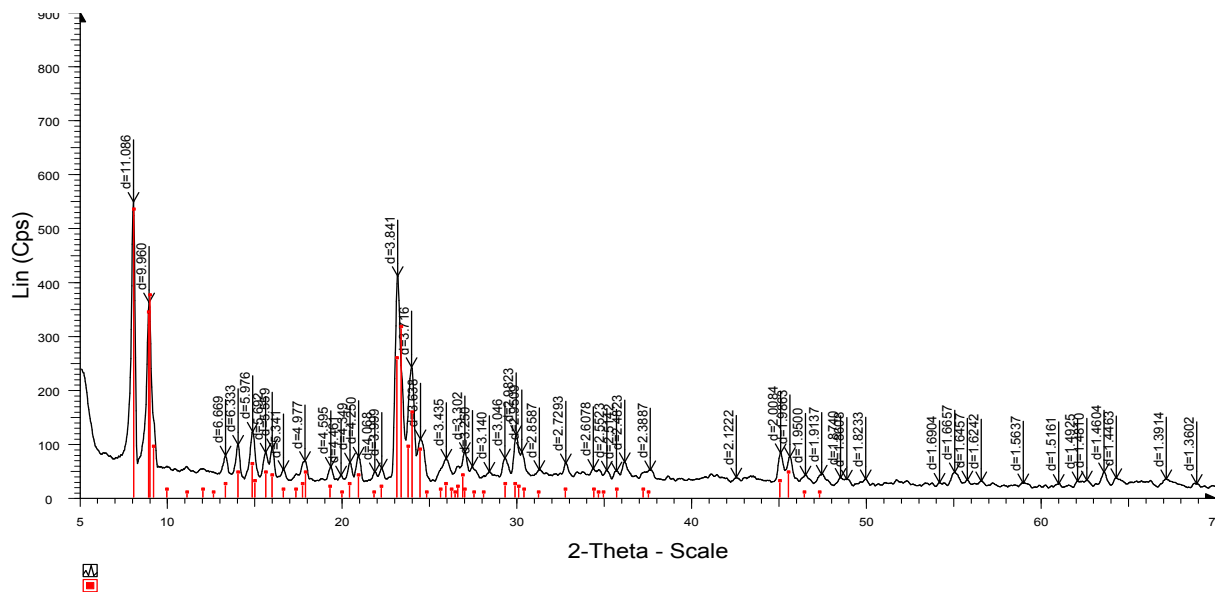

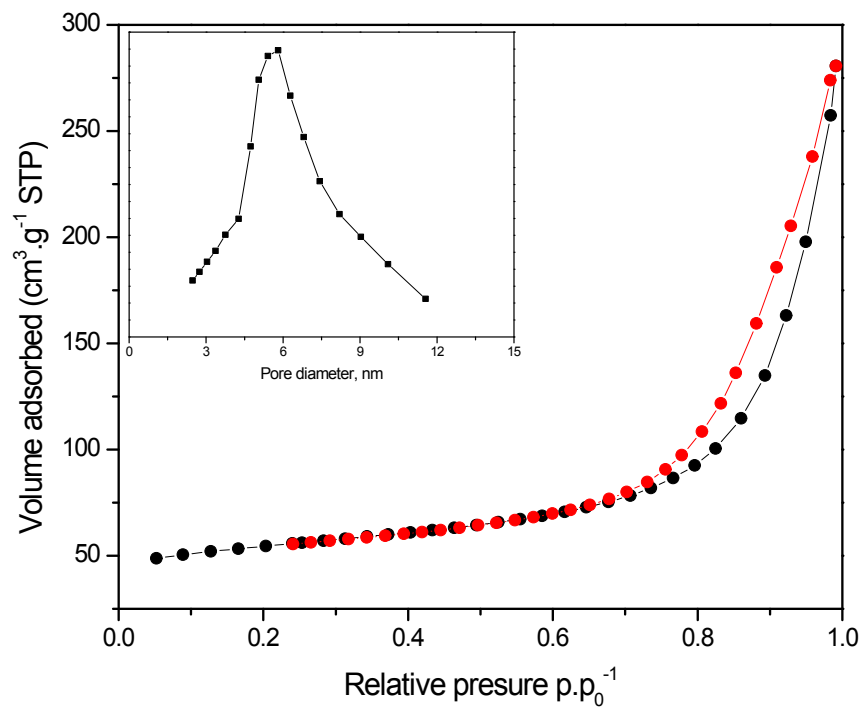

Figure S2. N<sub>2</sub> adsorption/desorption isotherms of mesoporous HSO<sub>3</sub>-ZSM-5 zeolite.

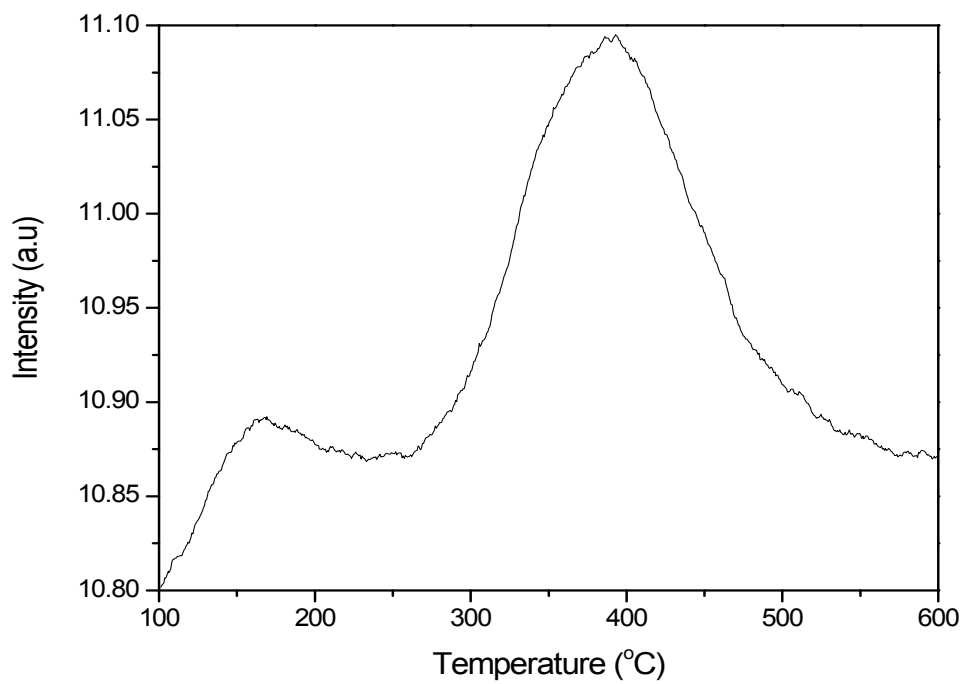

Figure S3. NH<sub>3</sub>-TPD profiles of the of mesoporous HSO<sub>3</sub>-ZSM-5 zeolite
